# Supplementary material
Source: Royal Society of Chemistry journal article supplement (doi:10.1039/d5cp04892c)
Supplement: d5cp04892c1.pdf [file d5cp04892c1.pdf]

# Supporting Information

## Janus monolayer SnPAs: a stable two-dimensional direct band gap semiconductor for overall photocatalytic water-splitting in a wide pH range

Xiong-Fei Zhang<sup>1</sup>, Yang Huang<sup>2</sup>, Fei-Jie Huang<sup>1</sup>, Ju-Qi Ruan<sup>1</sup>, Yi-Fen Zhao<sup>1</sup>,  
Fen Li<sup>1</sup>, Yiguo Xu<sup>3</sup>, and Qing-Yuan Chen<sup>1,\*</sup>

<sup>1</sup>School of Physical Science and Technology, Kunming University, Kunming 650214, China

<sup>2</sup>Institute of Nanoscience and Applications and Department of Electrical and Electronic Engineering, Southern University of Science and Technology, Shenzhen 518055, China

<sup>3</sup>Institute of Major Scientific Facilities for New Materials and Academy for Advanced Interdisciplinary Studies, Southern University of Science and Technology, Shenzhen 518055, China

\*Corresponding author: qingyuanchen212@163.com

### A. Gibbs Free Energy

Photocatalytic water-splitting contains two half-reactions, the oxygen evolution reaction (OER) and hydrogen evolution reaction (HER), where the two half-reactions can be obtained based on the theory developed by Nørskov et al [1]. The Gibbs free energy change ( $\Delta G$ ) can be calculated by the following equation [2–4]:

$$\Delta G = \Delta E + \Delta E_{\text{ZPE}} - T\Delta S, \quad (\text{S1})$$

where  $\Delta E$ ,  $\Delta E_{\text{ZPE}}$ , and  $\Delta S$  represent the differences in total energy, zero-point energy, and entropy of the slab with and without adsorbed intermediates. The system temperature  $T$  is set to be 298.15 K.

For the redox reactions of water-splitting, the reaction of HER can be decomposed into two steps:

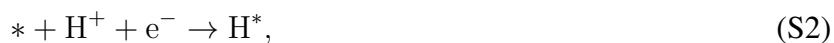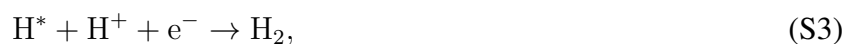

For OER, the half-reaction is divided into four steps:

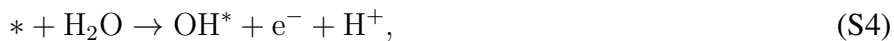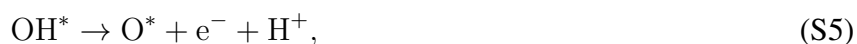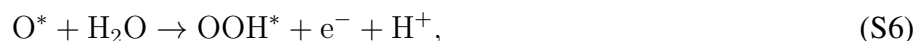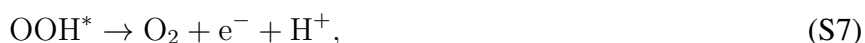

where  $*$  is the active site on photocatalysts,  $\text{O}^*$ ,  $\text{OH}^*$ ,  $\text{OOH}^*$ , and  $\text{H}^*$  represent the adsorbed intermediates.

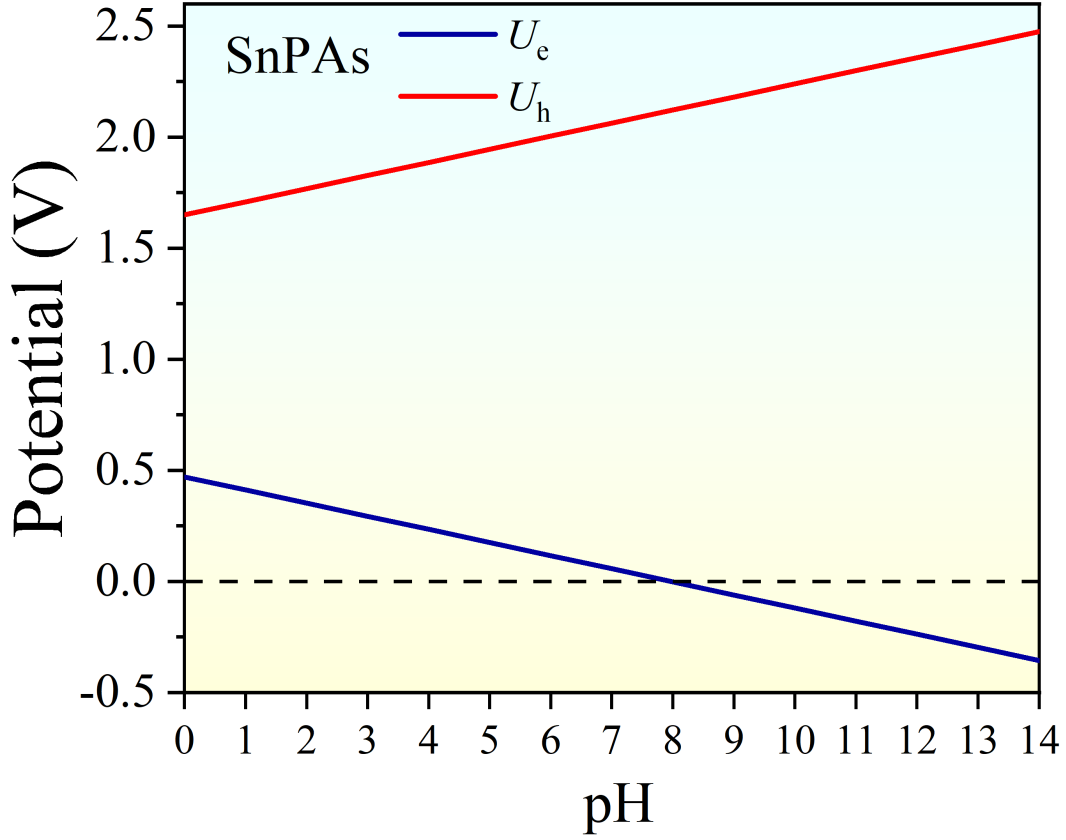

Fig. S1: The driving force for the photoreduction  $U_e$  and photooxidation  $U_h$  of the Janus SnPAs monolayer.

For HER,  $\Delta G$  under the effect of electrolyte pH is given by the following equation:

$$\Delta G_{H^*} = G_{H^*} - \frac{1}{2}G_{H_2} - G^* + 0.059 \times \text{pH} - eU. \quad (\text{S8})$$

For OER,  $\Delta G$  under the effect of electrolyte pH is given by the following equations:

$$\Delta G_1 = G_{OH^*} + \frac{1}{2}G_{H_2} - G_{H_2O} - G^* - 0.059 \times \text{pH} - eU, \quad (\text{S9})$$

$$\Delta G_2 = G_{O^*} + \frac{1}{2}G_{H_2} - G_{OH^*} - 0.059 \times \text{pH} - eU, \quad (\text{S10})$$

$$\Delta G_3 = G_{OOH^*} + \frac{1}{2}G_{H_2} - G_{H_2O} - G_{O^*} - 0.059 \times \text{pH} - eU, \quad (\text{S11})$$

$$\Delta G_4 = G_{O_2} + G^* + \frac{1}{2}G_{H_2} - G_{OOH^*} - 0.059 \times \text{pH} - eU, \quad (\text{S12})$$

where  $0.059 \times \text{pH}$  is the free energy contribution under the effect of pH,  $eU$  denotes the influence of extra potential bias provided by the electrons or holes in the electrode, and  $U$  is the electrode potential relative to the standard hydrogen electrode (SHE).

## B. Thermal Stability

To assess thermal stability, we conducted AIMD simulations on the SnPAs monolayer at 300 K for a duration of 20 ps, utilizing a 120-atom supercell with a time step of 2 fs, as shown in Fig. S2.

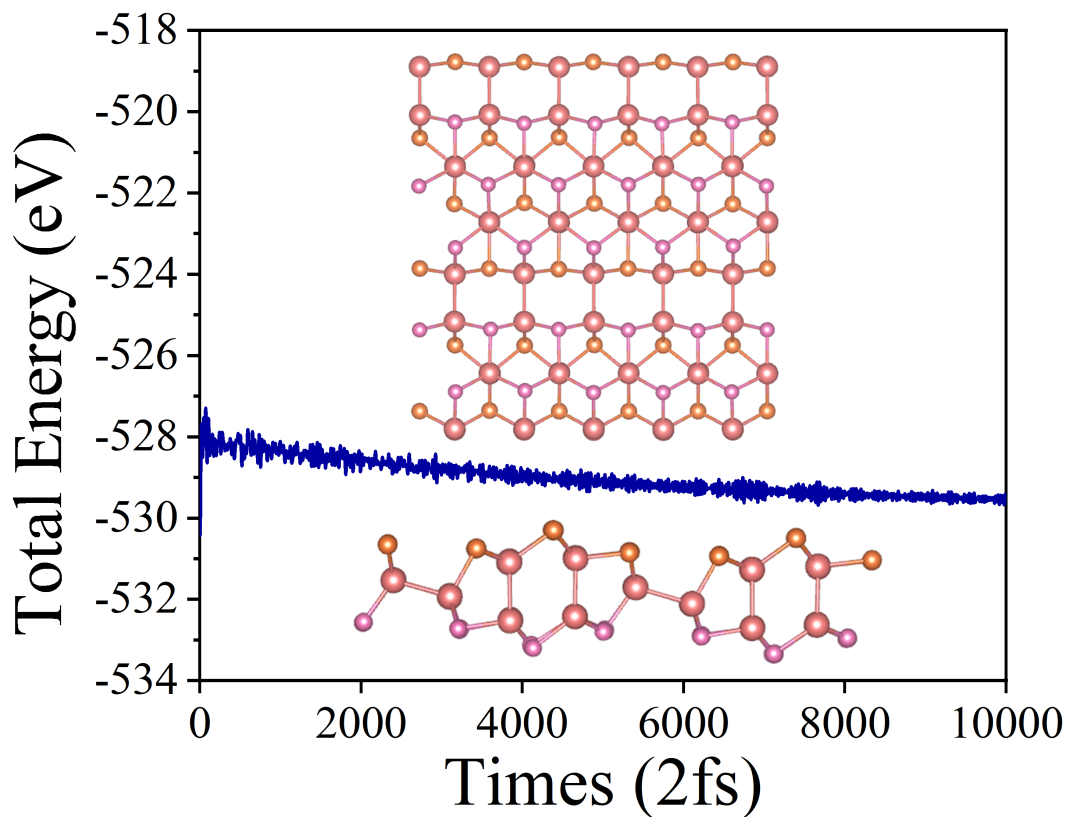

Fig. S2: Total energy of the SnPAs monolayer in AIMD simulations at 300 K over 20 ps. The top view and side view of the SnPAs monolayer supercell at 20 ps are inserted.

## C. vdW Correction

To account for long-range van der Waals (vdW) interactions in the Janus SnPAs monolayer, the vdW correction proposed by Grimme (DFT-D3) with the PBE functional was employed [5]. The corresponding band structure results are presented in Fig. S3 of the Supporting Information. The inclusion of vdW correction has only a negligible effect on both the band structure and the band gap, as can be seen by comparing Fig. S3 and Fig. 4(a) of the main text.

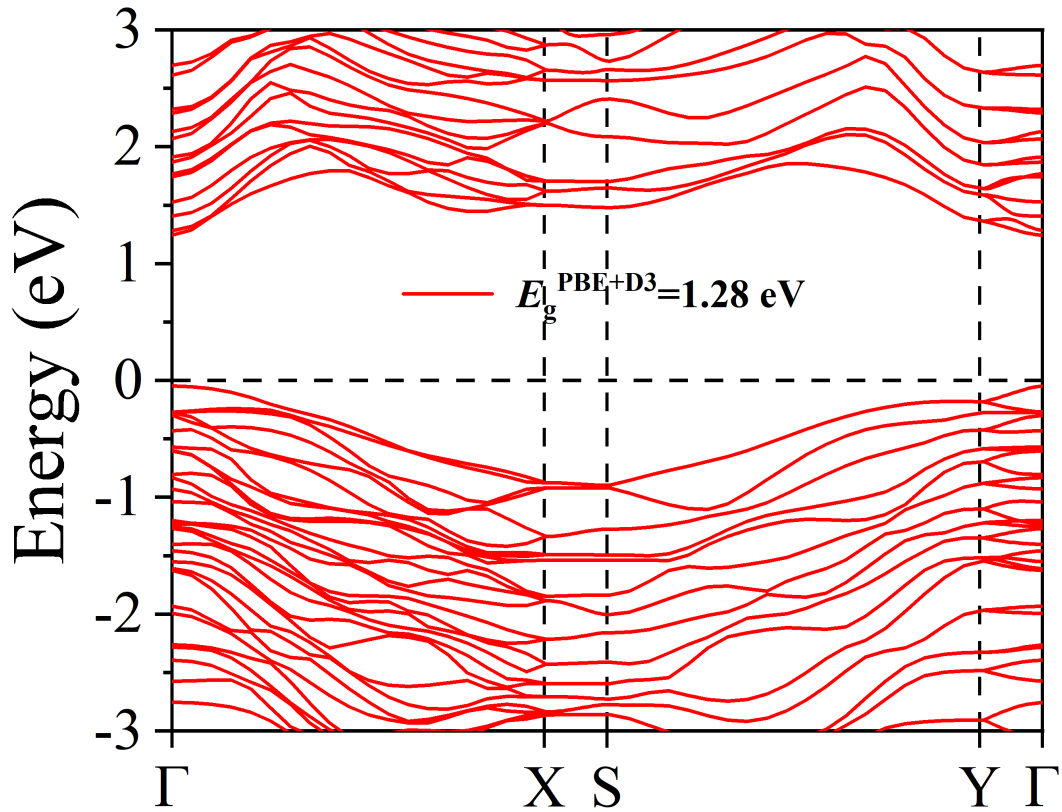

Fig. S3: The band structure calculated using the PBE method with the DFT-D3 van der Waals correction.

## References

- (1) J. K. Nørskov, J. Rossmeisl, A. Logadottir, L. Lindqvist, J. R. Kitchin, T. Bligaard, and H Jónsson. *The Journal of Physical Chemistry B*, 2004, **108**, 17886.
- (2) G. Gao, A. P. O'Mullane, and A. Du. *ACS Catalysis*, 2017, **7**, 494.
- (3) T. He, G. Gao, L. Kou, G. Will, and A. Du. *Journal of Catalysis*, 2017, **354**, 231.
- (4) D. Er, H. Ye, N. C. Frey, H. Kumar, J. Lou, and V. B. Shenoy. *Nano Letters*, 2018, **18**, 3943.
- (5) Stefan Grimme, Jens Antony, Stephan Ehrlich, and Helge Krieg. *The Journal of Chemical Physics*, 2010, **132**, 15.
